# Supplementary material for: New Cu(ii) complexes based on the hydroxo-bridged dinuclear [Cu(OH)2Cu] units: step-like di- and trimerizations of [Cu(OH)2Cu] units
Source: Royal Society of Chemistry journal article supplement (doi:10.1039/b916719f), 2010-11-12
Supplement: b916719f.pdf [file b916719f.pdf]

## Supporting information

**Table S1.** Selected bond lengths [Å] and angles [°] for  $\{[\text{Cu}_4(\text{bpy})_4(\text{OH})_4(\text{H}_2\text{O})_2]\}(\text{NO}_3)_2(\text{C}_7\text{H}_5\text{O}_2)_2 \cdot 6\text{H}_2\text{O} \mathbf{1}^a$

|           |          |                         |          |                         |          |
|-----------|----------|-------------------------|----------|-------------------------|----------|
| Cu1–O1    | 1.921(3) | Cu1–O3                  | 2.257(3) | Cu2–N4                  | 2.015(3) |
| Cu1–O2    | 1.973(2) | Cu2–O1                  | 1.920(3) | Cu2–O2 <sup>#1</sup>    | 2.301(2) |
| Cu1–N1    | 2.008(3) | Cu2–O2                  | 1.962(3) |                         |          |
| Cu1–N2    | 2.014(3) | Cu2–N3                  | 1.990(3) |                         |          |
| O1–Cu1–O2 | 82.5(1)  | N1–Cu1–O3               | 100.4(1) | O2–Cu2–O2 <sup>#1</sup> | 82.6(1)  |
| O1–Cu1–O3 | 90.3(1)  | N1–Cu1–N2               | 80.8(1)  | O2–Cu2–N3               | 176.6(1) |
| O1–Cu1–N1 | 169.2(1) | N2–Cu1–O3               | 107.7(1) | O2–Cu2–N4               | 99.3(1)  |
| O1–Cu1–N2 | 94.9(1)  | O1–Cu2–O2               | 82.8(1)  | N3–Cu2–O2 <sup>#1</sup> | 100.8(1) |
| O2–Cu1–O3 | 94.7(1)  | O1–Cu2–O2 <sup>#1</sup> | 101.5(1) | N3–Cu2–N4               | 80.8(1)  |
| O2–Cu1–N1 | 97.7(1)  | O1–Cu2–N3               | 96.2(1)  | N4–Cu2–O2 <sup>#1</sup> | 94.9(1)  |
| O2–Cu1–N2 | 157.5(1) | O1–Cu2–N4               | 163.6(1) |                         |          |

<sup>a</sup> Symmetry transformations used to generate equivalent atoms: #1 =  $-x+2, -y+1, -z+1$

**Table S2.** Selected bond lengths [Å] and angles [°] for  $\{[\text{Cu}_4(\text{bpy})_4(\text{OH})_4(\text{H}_2\text{O})_2]\}(\text{NO}_3)_2(\text{C}_5\text{H}_6\text{O}_4)\cdot 8\text{H}_2\text{O} \mathbf{2}$

|           |           |           |           |           |           |
|-----------|-----------|-----------|-----------|-----------|-----------|
| Cu1–O1    | 1.920(2)  | Cu2–O3    | 2.296(2)  | Cu3–N6    | 1.984(3)  |
| Cu1–O2    | 1.962(2)  | Cu2–N3    | 2.011(3)  | Cu4–O4    | 1.913(2)  |
| Cu1–O5    | 2.251(2)  | Cu2–N4    | 2.002(3)  | Cu4–O3    | 1.973(2)  |
| Cu1–N1    | 2.016(3)  | Cu3–O2    | 2.327(2)  | Cu4–N7    | 1.998(3)  |
| Cu1–N2    | 2.003(3)  | Cu3–O3    | 1.949(2)  | Cu4–N8    | 2.012(3)  |
| Cu2–O1    | 1.911(2)  | Cu3–O4    | 1.919(2)  | Cu4–O6    | 2.260(2)  |
| Cu2–O2    | 1.967(2)  | Cu3–N5    | 2.016(3)  |           |           |
| O1–Cu1–O2 | 81.38(9)  | O2–Cu2–O3 | 84.85(8)  | N6–Cu3–O2 | 97.69(9)  |
| O1–Cu1–O5 | 94.23(9)  | O2–Cu2–N3 | 100.5(1)  | N6–Cu3–N5 | 81.1(1)   |
| O1–Cu1–N1 | 167.81(9) | O2–Cu2–N4 | 174.7(1)  | O3–Cu4–O6 | 94.23(9)  |
| O1–Cu1–N2 | 94.8(1)   | N3–Cu2–O3 | 97.76(9)  | O3–Cu4–N7 | 98.5(1)   |
| O2–Cu1–O5 | 104.3(1)  | N4–Cu2–O3 | 100.03(9) | O3–Cu4–N8 | 155.61(9) |
| O2–Cu1–N1 | 99.0(1)   | N4–Cu2–N3 | 81.0(1)   | O4–Cu4–O3 | 80.59(9)  |
| O2–Cu1–N2 | 159.3(1)  | O3–Cu3–O2 | 84.42(8)  | O4–Cu4–O6 | 97.7(1)   |
| N1–Cu1–O5 | 97.5(1)   | O3–Cu3–N5 | 101.6(1)  | O4–Cu4–N7 | 168.3(1)  |
| N2–Cu1–O5 | 96.2(1)   | O3–Cu3–N6 | 176.4(1)  | O4–Cu4–N8 | 95.2(1)   |
| N2–Cu1–N1 | 80.6(1)   | O4–Cu3–O2 | 101.49(9) | N7–Cu4–O6 | 94.0(1)   |
| O1–Cu2–O2 | 81.47(9)  | O4–Cu3–O3 | 81.03(9)  | N7–Cu4–N8 | 80.8(1)   |
| O1–Cu2–O3 | 96.67(8)  | O4–Cu3–N5 | 161.1(1)  | N8–Cu4–O6 | 110.2(1)  |
| O1–Cu2–N3 | 165.56(9) | O4–Cu3–N6 | 95.6(1)   |           |           |
| O1–Cu2–N4 | 95.9(1)   | N5–Cu3–O2 | 97.36(9)  |           |           |

**Table S3.** Selected bond lengths [Å] and angles [°] for  $\{[\text{Cu}_4(\text{bpy})_4(\text{OH})_4(\text{H}_2\text{O})_2]\}(\text{C}_5\text{H}_6\text{O}_4)_2 \cdot 16\text{H}_2\text{O} \mathbf{3}^a$

|                         |          |                         |          |                         |          |
|-------------------------|----------|-------------------------|----------|-------------------------|----------|
| Cu1–O1                  | 1.91(3)  | Cu2–O2 <sup>#1</sup>    | 2.31(3)  | Cu3–N6                  | 2.01(4)  |
| Cu1–O2                  | 1.99(3)  | Cu2–N3                  | 1.98(4)  | Cu4–O4                  | 1.92(3)  |
| Cu1–O3                  | 2.25(4)  | Cu2–N4                  | 2.02(4)  | Cu4–O5                  | 1.96(3)  |
| Cu1–N1                  | 1.99(4)  | Cu3–O4                  | 1.91(3)  | Cu4–O5 <sup>#2</sup>    | 2.30(3)  |
| Cu1–N2                  | 2.01(4)  | Cu3–O5                  | 1.97(3)  | Cu4–N7                  | 2.03(4)  |
| Cu2–O1                  | 1.92(3)  | Cu3–O6                  | 2.24(4)  | Cu4–N8                  | 1.99(4)  |
| Cu2–O2                  | 1.95(3)  | Cu3–N5                  | 2.02(4)  |                         |          |
| O1–Cu1–O2               | 81.2(1)  | O2–Cu2–O2 <sup>#1</sup> | 84.6(1)  | N6–Cu3–O6               | 98.5(2)  |
| O1 Cu1 O3               | 91.3(2)  | O2–Cu2–N3               | 175.7(2) | N6–Cu3–N5               | 80.7(2)  |
| O1–Cu1–N1               | 168.6(2) | O2–Cu2–N4               | 100.9(1) | O4–Cu4–O5               | 81.8(1)  |
| O1 Cu1 N2               | 94.7(2)  | N3–Cu2–O2 <sup>#1</sup> | 98.9(1)  | O4–Cu4–O5 <sup>#2</sup> | 99.8(1)  |
| O2–Cu1–O3               | 98.8(1)  | N3–Cu2–N4               | 80.9(2)  | O4–Cu4–N7               | 163.2(1) |
| O2–Cu1–N1               | 98.2(2)  | N4–Cu2–O2 <sup>#1</sup> | 100.7(1) | O4–Cu4–N8               | 95.8(1)  |
| O2 Cu1 N2               | 156.5(2) | O4–Cu3–O5               | 81.7(1)  | O5–Cu4–O5 <sup>#2</sup> | 85.3(1)  |
| N1–Cu1–O3               | 100.0(2) | O4–Cu3–O6               | 92.0(1)  | O5–Cu4–N7               | 100.4(1) |
| N1 Cu1 N2               | 81.2(2)  | O4–Cu3–N5               | 95.3(1)  | O5–Cu4–N8               | 176.3(1) |
| N2–Cu1–O3               | 104.5(2) | O4–Cu3–N6               | 169.5(2) | N7–Cu4–O5 <sup>#2</sup> | 97.0(1)  |
| O1–Cu2–O2               | 82.1(3)  | O5–Cu3–O6               | 96.6(1)  | N8–Cu4–O5 <sup>#2</sup> | 97.9(1)  |
| O1–Cu2–O2 <sup>#1</sup> | 96.4(1)  | O5–Cu3–N5               | 157.2(1) | N8–Cu4–N7               | 81.1(2)  |
| O1–Cu2–N3               | 95.1(2)  | O5–Cu3–N6               | 98.1(1)  |                         |          |
| O1–Cu2–N4               | 162.8(2) | N5–Cu3–O6               | 106.1(2) |                         |          |

<sup>a</sup> Symmetry transformations used to generate equivalent atoms: #1 =  $-x, -y, -z+1$ , #2

=  $-x+1, y+1, -z+1$

**Table S4a.** Selected bond lengths [Å] and angles [°] for  
 $[\text{Cu}_6(\text{bpy})_6(\text{OH})_6(\text{H}_2\text{O})_2](\text{C}_8\text{H}_7\text{O}_2)_6 \cdot 12\text{H}_2\text{O} \mathbf{4}^a$

|                          |          |                          |          |                           |          |
|--------------------------|----------|--------------------------|----------|---------------------------|----------|
| Cu1–O1                   | 1.911(4) | Cu3–O2                   | 2.254(4) | Cu5–O5                    | 1.923(5) |
| Cu1–O2                   | 1.992(4) | Cu3–O3                   | 1.947(4) | Cu5–O6                    | 1.978(5) |
| Cu1–O4                   | 2.207(5) | Cu3–O3 <sup>#1</sup>     | 1.966(4) | Cu5–O7 <sup>#2</sup>      | 2.380(5) |
| Cu1–N1                   | 2.015(5) | Cu3–N5                   | 1.997(5) | Cu5–N9                    | 2.007(6) |
| Cu1–N2                   | 1.997(5) | Cu3–N6                   | 2.018(5) | Cu5–N10                   | 2.016(6) |
| Cu2–O1                   | 1.910(4) | Cu4–O5                   | 1.934(5) | Cu6–O6                    | 2.269(5) |
| Cu2–O2                   | 1.974(4) | Cu4–O6                   | 2.004(5) | Cu6–O7                    | 1.962(4) |
| Cu2–O3 <sup>#1</sup>     | 2.327(4) | Cu4–O8                   | 2.203(5) | Cu6–O7 <sup>#2</sup>      | 1.962(4) |
| Cu2–N3                   | 2.007(5) | Cu4–N7                   | 2.019(6) | Cu6–N11                   | 2.026(5) |
| Cu2–N4                   | 1.995(5) | Cu4–N8                   | 2.013(6) | Cu6–N12                   | 1.999(5) |
| O1–Cu1–O2                | 79.6(2)  | O2–Cu3–O3                | 100.2(2) | O5–Cu5–O6                 | 83.1(2)  |
| O1–Cu1–O4                | 92.8(2)  | O2–Cu3–O3 <sup>#1</sup>  | 86.8(2)  | O5–Cu5–O7 <sup>#2</sup>   | 95.4(2)  |
| O1–Cu1–N1                | 97.4(2)  | O2–Cu3–N5                | 98.8(2)  | O5–Cu5–N9                 | 166.1(2) |
| O1–Cu1–N2                | 171.6(2) | O2–Cu3–N6                | 95.9(2)  | O5–Cu5–N10                | 95.3(2)  |
| O2–Cu1–O4                | 95.5(2)  | O3–Cu3–O3 <sup>#1</sup>  | 81.5(2)  | O6–Cu5–O7 <sup>#2</sup>   | 82.7(2)  |
| O2–Cu1–N1                | 157.4(2) | O3–Cu3–N5                | 161.0(2) | O6–Cu5–N9                 | 99.2(2)  |
| O2–Cu1–N2                | 98.8(2)  | O3–Cu3–N6                | 98.5(2)  | O6–Cu5–N10                | 173.5(2) |
| O4–Cu1–N1                | 107.1(2) | O3 <sup>#1</sup> –Cu3–N5 | 98.5(2)  | O7 <sup>#2</sup> –Cu5–N9  | 98.5(2)  |
| O4–Cu1–N2                | 95.6(2)  | O3 <sup>#1</sup> –Cu3–N6 | 177.3(2) | O7 <sup>#2</sup> –Cu5–N10 | 103.7(2) |
| N1–Cu1–N2                | 80.9(2)  | N5–Cu3–N6                | 80.6(2)  | N9–Cu5–N10                | 80.9(2)  |
| O1–Cu2–O2                | 80.1(2)  | O5–Cu4–O6                | 82.2(2)  | O6–Cu6–O7                 | 109.7(2) |
| O1–Cu2–O3 <sup>#1</sup>  | 98.4(2)  | O5–Cu4–O8                | 91.9(2)  | O6–Cu6–O7 <sup>#2</sup>   | 86.1(2)  |
| O1–Cu2–N3                | 162.3(2) | O5–Cu4–N7                | 96.2(2)  | O6–Cu6–N11                | 95.1(2)  |
| O1–Cu2–N4                | 98.9(2)  | O5–Cu4–N8                | 173.0(2) | O6–Cu6–N12                | 96.9(2)  |
| O2–Cu2–O3 <sup>#1</sup>  | 84.7(2)  | O6–Cu4–O8                | 88.5(2)  | O7–Cu6–O7 <sup>#2</sup>   | 79.7(2)  |
| O2–Cu2–N3                | 99.3(2)  | O6–Cu4–N7                | 162.5(2) | O7–Cu6–N11                | 155.1(2) |
| O2–Cu2–N4                | 177.8(2) | O6–Cu4–N8                | 99.1(2)  | O7–Cu6–N12                | 97.7(2)  |
| O3 <sup>#1</sup> –Cu2–N3 | 99.1(2)  | O8–Cu4–N7                | 109.0(2) | O7 <sup>#2</sup> –Cu6–N11 | 100.7(2) |
| O3 <sup>#1</sup> –Cu2–N4 | 97.5(2)  | O8–Cu4–N8                | 95.0(2)  | O7 <sup>#2</sup> –Cu6–N12 | 176.6(2) |
| N3–Cu2–N4                | 81.1(2)  | N7–Cu4–N8                | 80.6(3)  | N11–Cu6–N12               | 80.7(2)  |

<sup>a</sup>Symmetry transformations used to generate equivalent atoms: #1 =  $-x+1, -y+1, -z$ ;  
#2 =  $-x, -y+1, -z+1$

**Table S4b.** Hydrogen bonding contacts for [Cu<sub>6</sub>(bpy)<sub>6</sub>(OH)<sub>6</sub>(H<sub>2</sub>O)<sub>2</sub>](C<sub>8</sub>H<sub>7</sub>O<sub>2</sub>)<sub>6</sub>·12H<sub>2</sub>O  
**4<sup>a</sup>**

| D–H···A                         | d(D–H) | d(H···A) | ∠DHA | d(D···A) |
|---------------------------------|--------|----------|------|----------|
| O1–H1A···O20                    | 0.87   | 1.90     | 176  | 2.768    |
| O2–H2A···O13                    | 0.90   | 2.04     | 175  | 2.934    |
| O3–H3A···O14                    | 0.87   | 1.87     | 175  | 2.731    |
| O4–H4A···O22                    | 0.85   | 1.83     | 177  | 2.679    |
| O4–H4B···O12                    | 0.79   | 1.96     | 169  | 2.733    |
| O5–H5···O17 <sup>#3</sup>       | 0.86   | 1.94     | 150  | 2.717    |
| O6–H6···O9                      | 0.86   | 2.00     | 172  | 2.852    |
| O7–H7···O18 <sup>#4</sup>       | 0.91   | 1.95     | 171  | 2.854    |
| O8–H8B···O10                    | 0.84   | 1.91     | 153  | 2.676    |
| O8–HA···O16 <sup>#3</sup>       | 0.85   | 1.85     | 160  | 2.669    |
| O21–H21B···O9 <sup>#4</sup>     | 0.88   | 1.91     | 172  | 2.784    |
| O21–H21A···O18                  | 0.88   | 1.96     | 154  | 2.784    |
| O22–H22A···O19                  | 0.85   | 1.82     | 163  | 2.642    |
| O22–H22B···O23 <sup>#4</sup>    | 0.84   | 1.89     | 161  | 2.707    |
| O23–H23A···O11                  | 0.88   | 1.86     | 172  | 2.734    |
| O23–H23B···O11 <sup>#4</sup>    | 0.84   | 1.98     | 178  | 2.828    |
| O24–H24A···O28                  | 0.86   | 2.06     | 156  | 2.871    |
| O24–H24B···O26 <sup>#5</sup>    | 0.86   | 2.03     | 167  | 2.864    |
| O25–H25A···O14 <sup>#1</sup>    | 0.88   | 2.10     | 174  | 2.979    |
| O25–H25B···O20                  | 0.73   | 2.19     | 175  | 2.922    |
| O26–H26A···O27                  | 0.76   | 1.98     | 158  | 2.697    |
| O26–H26B···O17                  | 0.86   | 1.89     | 170  | 2.744    |
| O27–H27A···O16                  | 0.87   | 1.87     | 161  | 2.709    |
| O27–H27B···O5 <sup>#6</sup>     | 0.86   | 1.89     | 164  | 2.730    |
| O28–H28A···O13                  | 0.89   | 1.94     | 166  | 2.812    |
| O28–H28B···O12                  | 0.82   | 1.95     | 175  | 2.764    |
| O29–H29A···O15 <sup>#3</sup>    | 0.86   | 1.88     | 178  | 2.745    |
| O29–H29B···O10                  | 0.82   | 2.04     | 156  | 2.807    |
| O30–H30B···O21                  | 0.88   | 2.05     | 149  | 2.837    |
| O30–H30A···O32B_b <sup>#4</sup> | 0.88   | 1.55     | 144  | 2.312    |
| O30–H30A···O32A_a <sup>#4</sup> | 0.88   | 2.03     | 155  | 2.844    |
| O31–H31B···O15 <sup>#7</sup>    | 0.77   | 1.95     | 177  | 2.715    |
| O31–H31A···O29 <sup>#4</sup>    | 0.82   | 2.06     | 162  | 2.848    |
| O32–H32B_a···O26 <sup>#5</sup>  | 0.85   | 1.99     | 163  | 2.818    |
| O32–H32A_a···O28                | 0.89   | 2.25     | 162  | 3.100    |

<sup>a</sup> Symmetry transformations used to generate equivalent atoms: #1 = -x+1, -y+1, -z; #2 = -x, -y+1, -z+1; #3 = x-1, y, z; #4 = -x+1, -y+1, -z+1; #5 = x, y+1, z; #6 = x+1, y+1, z; #7 = x, y, z+1

**Table S6** The IR spectrum data, elemental analyses data and fitted magnetic data of complexes **1–4**

|                                    | <b>1</b>                                                                                                                                                   | <b>2</b>                                                                                                                                                     | <b>3</b>                                                                                                                                                | <b>4</b>                                                                                                                                                     |
|------------------------------------|------------------------------------------------------------------------------------------------------------------------------------------------------------|--------------------------------------------------------------------------------------------------------------------------------------------------------------|---------------------------------------------------------------------------------------------------------------------------------------------------------|--------------------------------------------------------------------------------------------------------------------------------------------------------------|
| IR data ( $\nu \text{ cm}^{-1}$ ): | 3381 vs, 3109 vw, 3022 vw, 1647 w, 1601 m, 1553 s, 1447 m, 1385 vs, 1319 w, 1161 w, 1030 w, 770 m, 729 m, 486 w.                                           | 3383 vs, 3109 vw, 3022 vw, 1651 m, 1601 m, 1556 s, 1447 s, 1385 vs, 1161 w, 1028 w, 770 m, 731 m, 489 w                                                      | 3381 vs, 3107 vw, 3030 vw, 1647 w, 1601 m, 1558 s, 1448 m, 1396 vs, 1319 w, 1161 w, 1030 w, 770 m, 729 m, 490 w                                         | 3363 m, 3058 w, 1574 s, 1494 m, 1446 m, 1367 s, 1030 m, 769 s, 731 s                                                                                         |
| elemental analyses                 | Anal. Calcd. for $\text{C}_{54}\text{H}_{62}\text{Cu}_4\text{N}_{10}\text{O}_{22}$ (%): C, 44.44; H, 4.28; N, 9.60. Found (%): C, 44.26; H, 4.36; N, 9.51. | Anal. Calcd. for $\text{C}_{45}\text{H}_{57}\text{Cu}_4\text{N}_{10}\text{O}_{24}$ (%): C, 39.08; H, 4.15; N, 10.12. Found (%): C, 38.96; H, 4.05; N, 10.30. | Anal. Calcd. for $\text{C}_{50}\text{H}_{84}\text{Cu}_4\text{N}_8\text{O}_{30}$ (%): C, 39.17; H, 5.52; N, 7.31. Found (%): C, 39.25; H, 5.43; N, 7.37. | Anal. Calcd. for $\text{C}_{108}\text{H}_{124}\text{Cu}_6\text{N}_{12}\text{O}_{32}$ (%): C, 52.23; H, 5.03; N, 6.75. Found (%): C, 52.63; H, 5.33; N, 6.90. |
| Magnetic scheme                    | 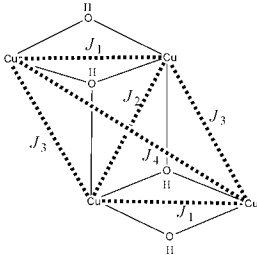                                                                        |                                                                                                                                                              |                                                                                                                                                         |                                                                          |
| Fitted parameters                  | $J_1 = 64.1 \text{ cm}^{-1}$ , $J_2 = 5.7 \text{ cm}^{-1}$ , $g = 2.06$                                                                                    | $J_1 = 20.3 \text{ cm}^{-1}$ , $J_2 = 8.9 \text{ cm}^{-1}$ , $g = 2.32$                                                                                      | $J_1 = 35.4 \text{ cm}^{-1}$ , $J_2 = 3.4 \text{ cm}^{-1}$ , $g = 2.02$                                                                                 | $J_1 = 5.0 \text{ cm}^{-1}$ , $J_2 = -25.1 \text{ cm}^{-1}$ , $g = 2.18$                                                                                     |

**Figure S1.** PXRD, I.R spectrum and TG curves for **1**.

**Figure S2.** PXRD, I.R spectrum and TG curves for **2**.

**Figure S3.** PXRD, I.R spectrum and TG curves for **3**.

**Figure S4.** PXRD, I.R spectrum and TG curves for **4**.

**Figure S5.** 2D (4,4) topological supramolecular layers generated from the  $[\text{Cu}_4(\text{bpy})_4(\mu_2\text{-OH})_2(\mu_3\text{-OH})_2]^{4+}$  complex cations based on intercationic face-to-face  $\pi\cdots\pi$  stacking interactions in **2**.

**Figure S6.** Hydrogen bonded network of disordered nitrate  $\text{NO}_3^-$ , benzoate  $(\text{C}_7\text{H}_5\text{O}_2)^-$  anions and lattice water molecules in **1**.

**Figure S7.** Hydrogen bonded network of nitrate  $\text{NO}_3^-$ , glutarate  $(\text{C}_5\text{H}_6\text{O}_4)^{2-}$  anions and lattice water molecules in **2**.

**Figure S8.** Hydrogen bonded network of glutarate  $(\text{C}_5\text{H}_6\text{O}_4)^{2-}$  anions and lattice water molecules in **3**.

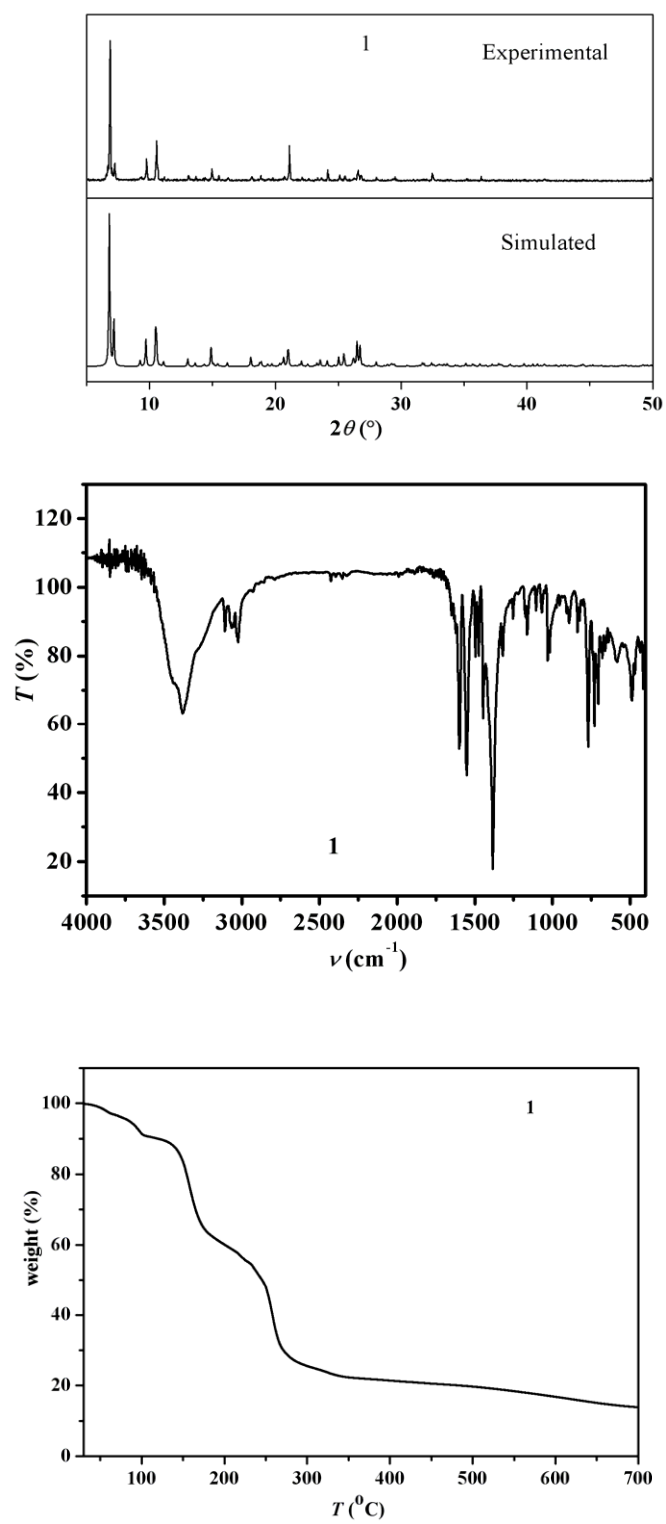

Figure S1



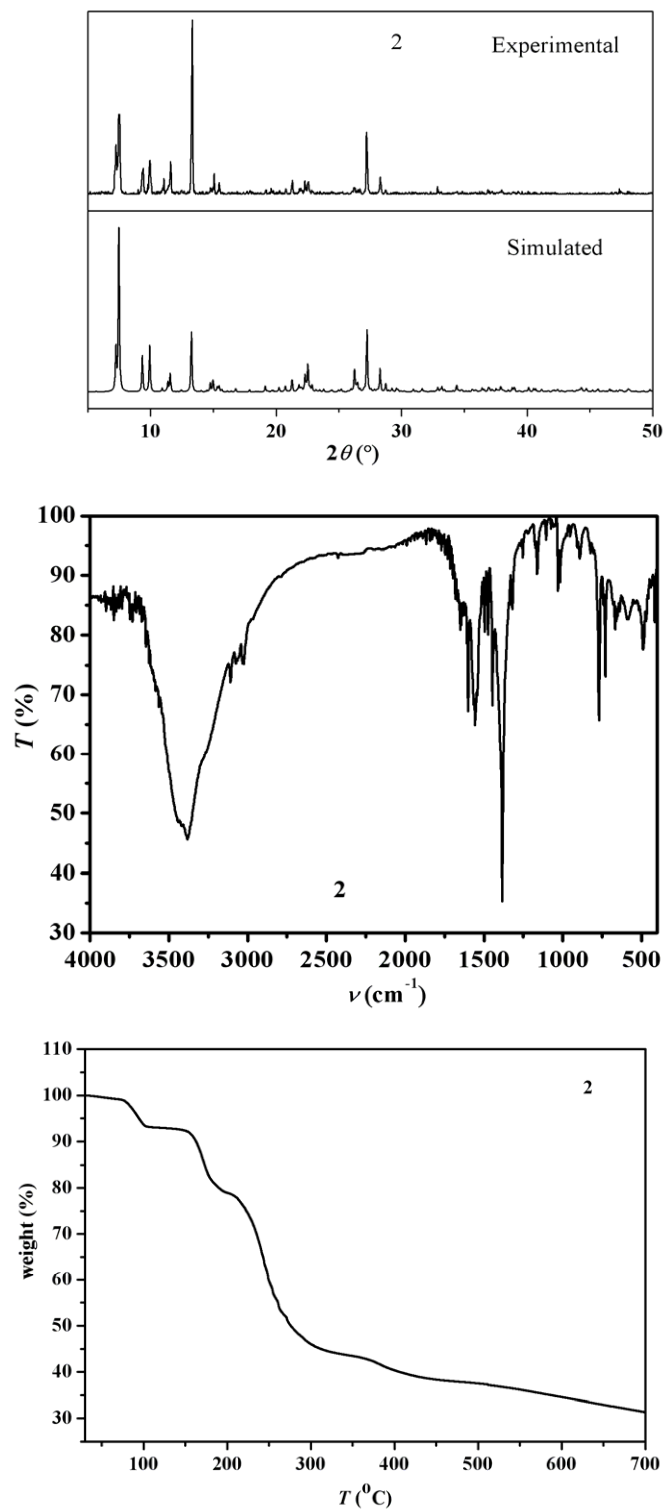

Figure S2

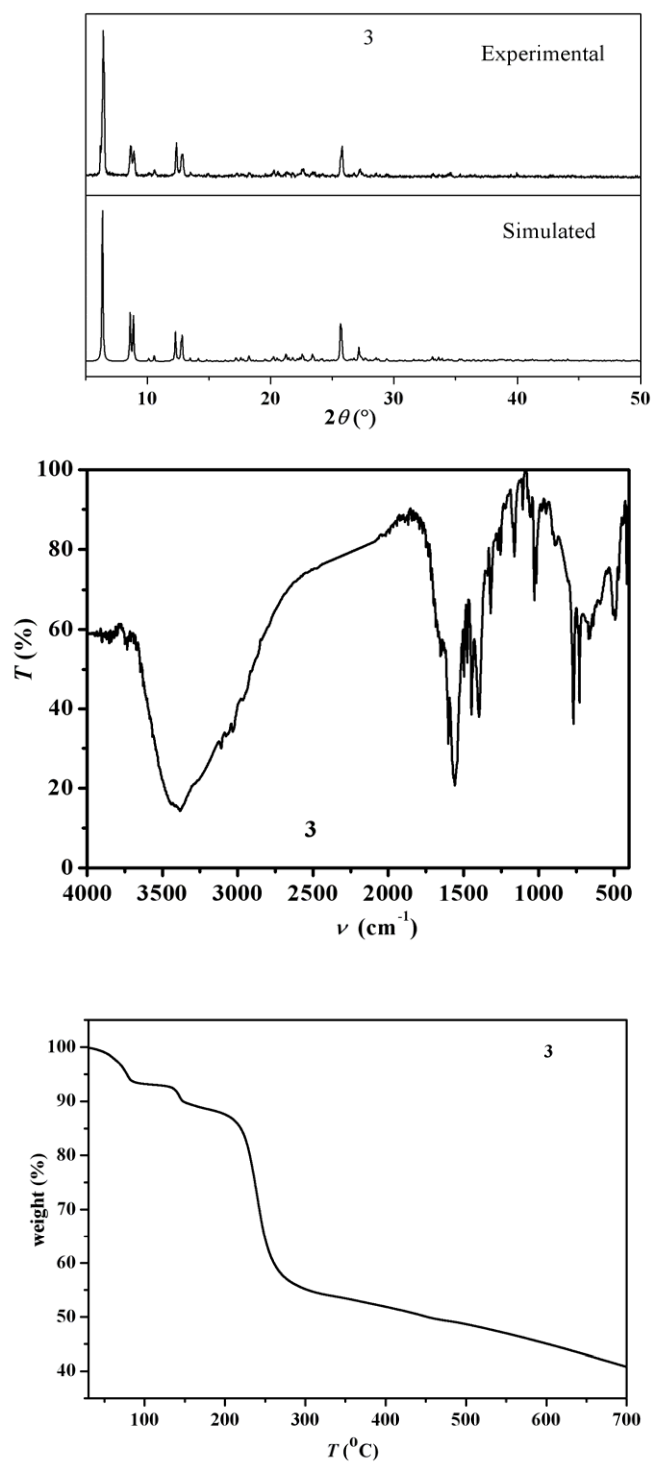

Figure S3

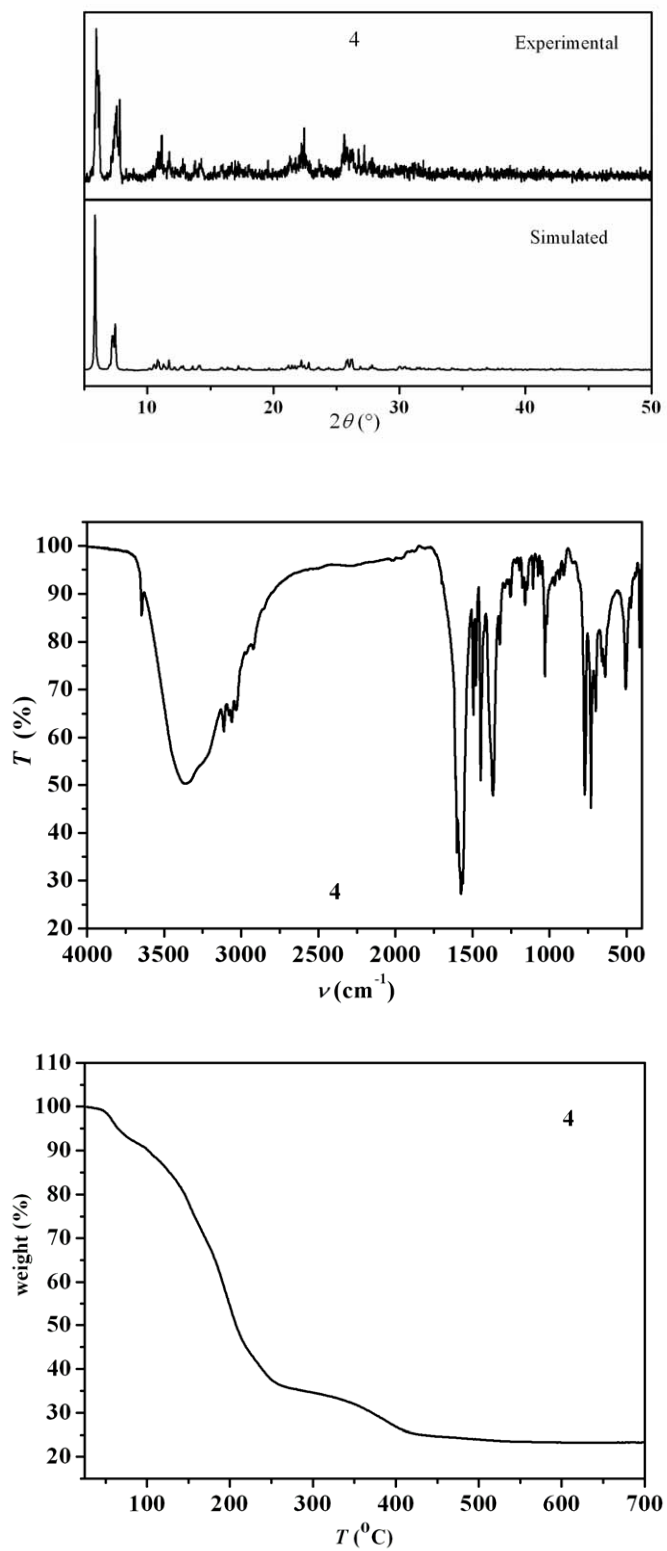

Figure S4

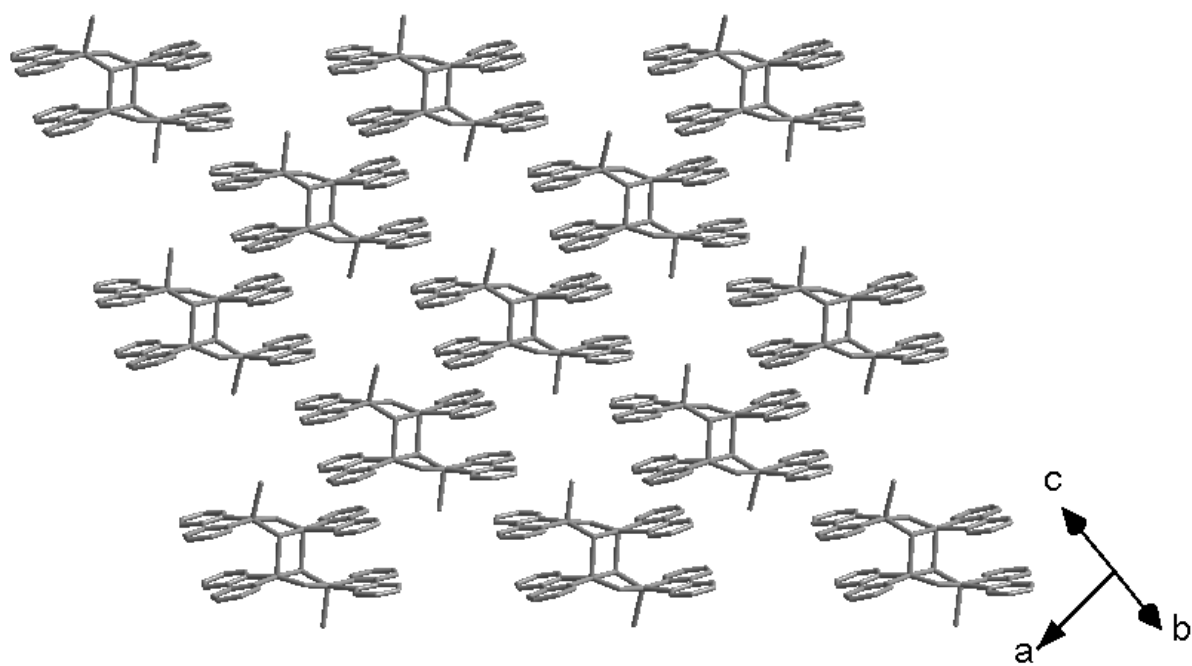

**Figure S5**

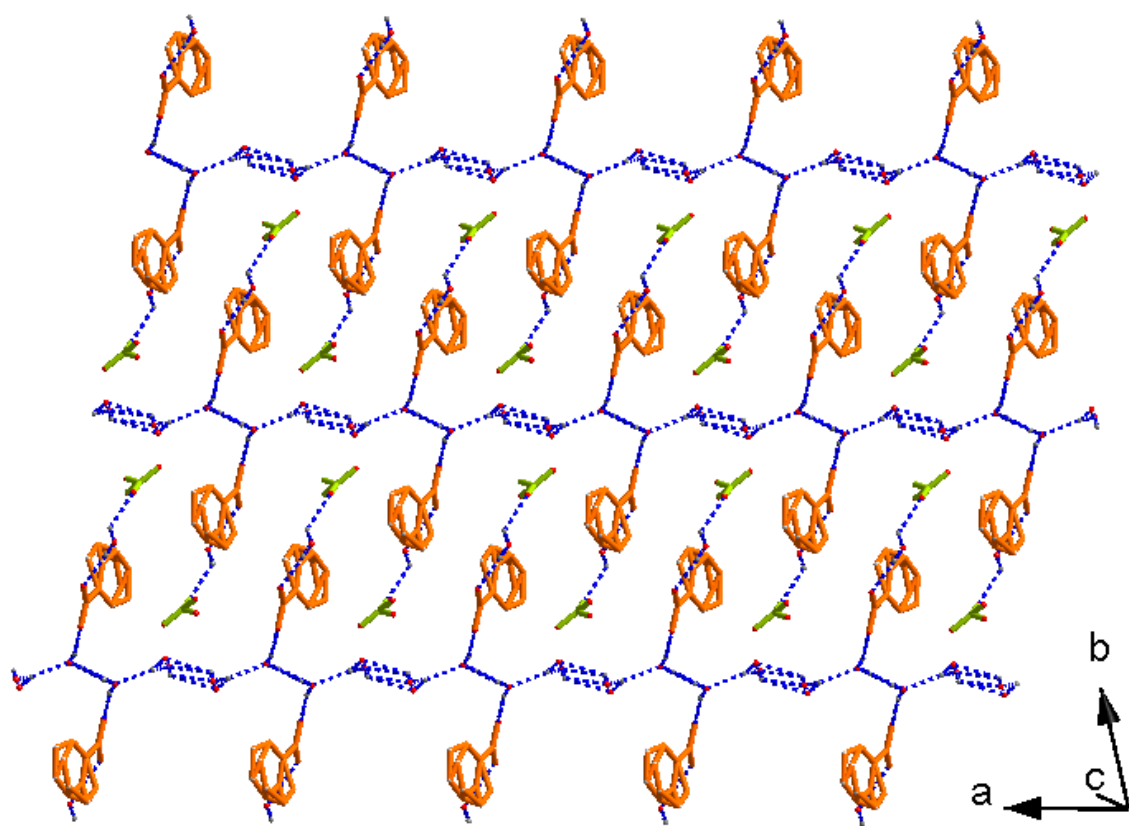

Figure S6

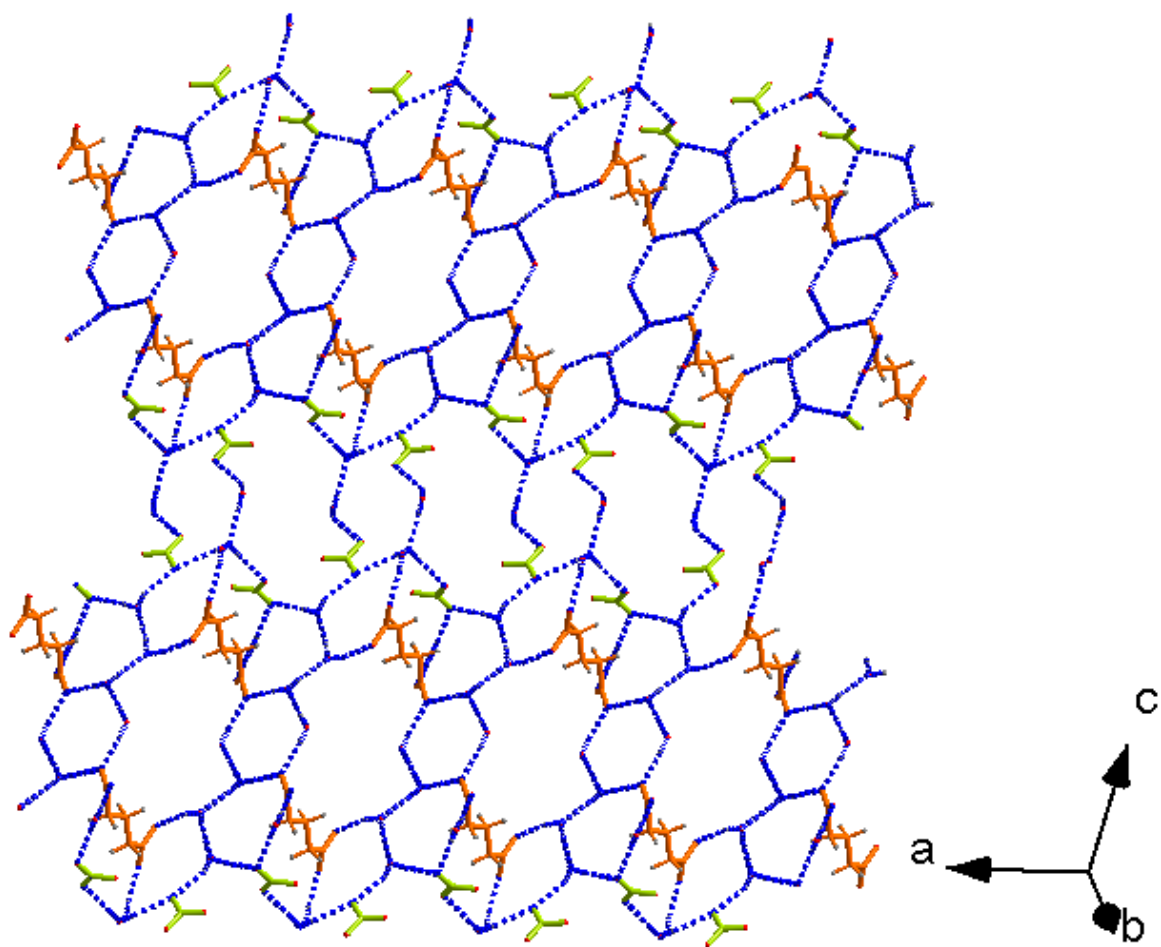

Figure S7

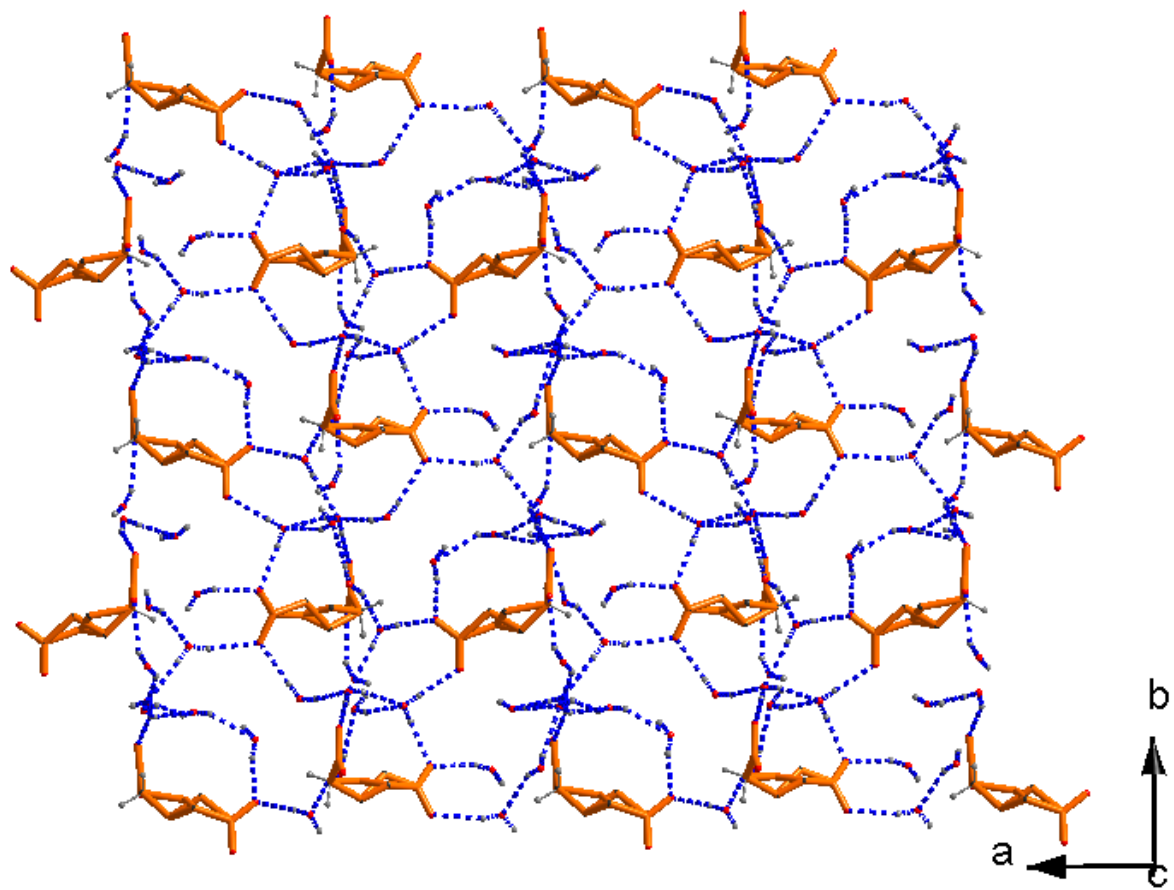

Figure S8
